# Supplementary material for: Direct observation of the geometric isomer selectivity of a reaction controlled via adsorbed bromine
Source: Royal Society of Chemistry journal article supplement (doi:10.1039/c9nr09857g), 2019-12-27
Supplement: c9nr09857g1.pdf [file c9nr09857g1.pdf]

## Supporting Information:

### Direct Observation of the Geometric Isomer Selectivity of a Reaction Controlled via Adsorbed Bromine

Jeremy F. Schultz,<sup>†</sup> Bing Yang,<sup>‡</sup> Nan Jiang<sup>†,\*</sup>

<sup>†</sup>*Department of Chemistry, University of Illinois at Chicago, Chicago, Illinois 60607, United States*

<sup>‡</sup>*Energy Research Resources Division, Dalian Institute of Chemical Physics, Dalian, China, 116023*

Corresponding Author:

\*Email: [njiang@uic.edu](mailto:njiang@uic.edu)

#### 1. Results of a Room Temperature Deposition and Following a Slight Anneal

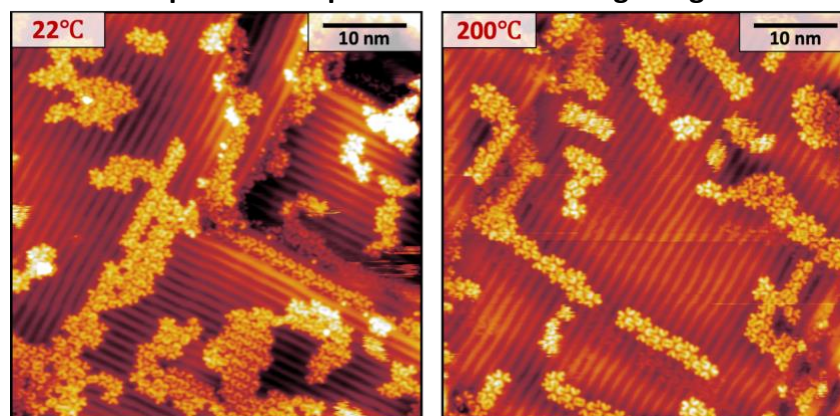

**Figure S1.** STM images following a room temperature deposition and an anneal to 200°C. The DBPQ molecules are observed to remain intact with no dissociation of the C-Br bond and no bromine atoms visible on the surface.  $U = +1.0\text{ V}$ ,  $I = 100\text{ pA}$ .

The above STM images depict the results of a room temperature deposition of DBPQ on Au(100) and following an anneal to 200°C. These results closely match the STM image that appears in **Figure 1** of the main text. No long-range ordering is observed, but some clusters are evident as a result of hydrogen bonding between aromatic hydrogens and the oxygen atoms in the ketone functional groups. The STM image showing the results of the anneal to 200°C demonstrates the stability of the C-Br bond in the case of these molecules. This stability is further confirmed by the absence of any bromine atoms observed on the surface in STM imaging. A result consistent with previously published studies involving this class of reactions on Au(111).<sup>1</sup>

## 2. Results of a Thermal Anneal on Au(111)

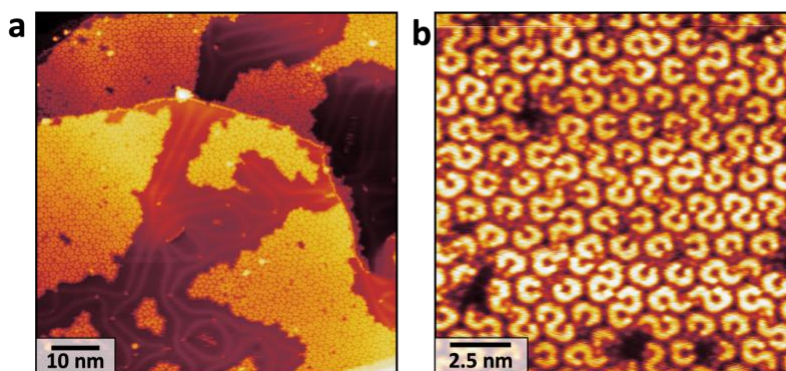

**Figure S2.** STM images following an anneal to 375°C after the deposition of DBPQ onto a room temperature Au(111) substrate. (a) Zoomed-out image showing the absence of bromine on the surface.  $U = -1.0\text{ V}$ ,  $I = 100\text{ pA}$ . (b) Zoomed-in image illustrating the early termination of the reaction process, the most common products visible are cis dimers and S-shaped tetramers on this surface.  $U = -1.0\text{ V}$ ,  $I = 100\text{ pA}$ .

## References

1. L. Dong, P. N. Liu and N. Lin, *Acc. Chem. Res.*, 2015, **48**, 2765-2774.
